# Supplementary material
Source: MDPI journal article supplement (https://www.mdpi.com/2076-3298/11/5/103)
Supplement: s1 [file s1 › environments-2995678-supplementary.pdf]

Supplementary data

## A Microplastic Pollution Hotspot: Elevated Levels in Sediments from the San Francisco Bay Area

Lara Dronjak <sup>1</sup>, Joaquim Rovira <sup>1,2,3,\*</sup>, Diana Lin <sup>4</sup>, June-Soo Park <sup>5,6</sup>, Sutapa Ghosal <sup>7</sup>, Nora Expósito <sup>1</sup>, Marta Schuhmacher <sup>1</sup> and Jordi Sierra <sup>1,8</sup>

<sup>1</sup> Environmental Engineering Laboratory, Department of Chemical Engineering, University Rovira and Virgili, Paisos Catalans Avenue 26, 43007 Tarragona, Catalonia, Spain; ldronjak@aus.edu (L.D.)

<sup>2</sup> Laboratory of Toxicology and Environmental Health, School of Medicine, University Rovira and Virgili, Sant Llorenç 21, 43201 Reus, Catalonia, Spain

<sup>3</sup> Institut d'Investigació Sanitària Pere Virgili (IISPV), 43204 Reus, Catalonia, Spain

<sup>4</sup> San Francisco Estuary Institute, 4911 Central Avenue, Richmond, CA 94804, USA

<sup>5</sup> Department of Toxic Substances Control, California Environmental Protection Agency, 700 Heinz Avenue, Suite 100, Berkeley, CA 94710, USA

<sup>6</sup> Department of Obstetrics, Gynecology and Reproductive Sciences, University of California-San Francisco, San Francisco, CA 94143, USA

<sup>7</sup> California Department of Public Health, Environmental Health Laboratory Branch, 850 Marina Bay Parkway, Richmond, CA 94804, USA; sutapa.ghosal@cdph.ca.gov

<sup>8</sup> Faculty of Pharmacy and Food Sciences, Universitat de Barcelona, Joan XXIII Avenue s/n, 08028 Barcelona, Catalonia, Spain

\* Correspondence: joaquim.rovira@urv.cat; Tel.: +34-977558553

### 1. Sampling of microplastics

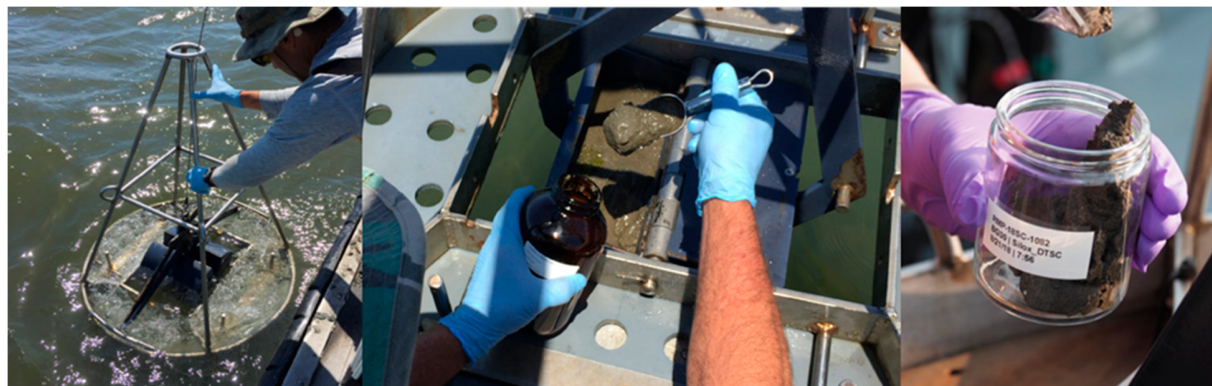

*Figure S1 Sediment sampling*

Table S1 MPs sampling points

| <i>N</i> | <i>SAMPLE ID</i> | <i>TARGET LATITUDE</i> | <i>TARGET LONGITUDE</i> | <i>DEPTH [M]</i> | <i>LOCATION</i> |
|----------|------------------|------------------------|-------------------------|------------------|-----------------|
| 1        | LSB01            | 37.46823888            | -122.0639734            | 3.7+             | Lower South Bay |
| 2        | LSB02            | 37.49183613            | -122.0985143            | 3.7+             | Lower South Bay |
| 3        | SB01             | 37.55903527            | -122.210577             | 3.7+             | South Bay       |
| 4        | SB02             | 37.61019366            | -122.1673764            | 0.3 to 0.9       | South Bay       |
| 5        | CB01             | 37.82232768            | -122.3492815            | 3.7+             | Central Bay     |
| 6        | CB02             | 37.87631112            | -122.3615019            | 1.8 to 3.7       | Central Bay     |
| 7        | NB01             | 38.05895268            | -121.8143678            | 3.7+             | North Bay       |
| 8        | NB02             | 38.02282086            | -121.8083671            | 3.7+             | North Bay       |
| C1       | Core 1           | 37.507007              | -122.245120             |                  | South Bay       |
| C2       | Core 2           | 37.504393              | -122.215279             |                  | Lower South Bay |

## 2. Surface sediment characteristics

Sample characteristics are presented in Table S2.

Table S2. Total mass analyzed per sample

| <i>Sample ID</i> | <i>Mass of the sample-<br/>wet weight [g<sub>w.w.</sub>]</i> | <i>Humidity %</i> | <i>Mass of the sample-<br/>dry weight [g<sub>d.w.</sub>]</i> |
|------------------|--------------------------------------------------------------|-------------------|--------------------------------------------------------------|
| 1024 BA41        | 100.50                                                       | 61.14             | 39.05                                                        |
| 1036 BC11        | 100.60                                                       | 54.60             | 45.67                                                        |
| 1011 BA10        | 100.00                                                       | 44.11             | 55.89                                                        |
| 1201 SB002S      | 100.30                                                       | 63.01             | 37.10                                                        |
| 1161 LSB001S     | 100.80                                                       | 50.92             | 49.47                                                        |
| 1107 CB001S      | 102.10                                                       | 50.42             | 50.63                                                        |
| 1070 BG20        | 100.70                                                       | 20.61             | 79.95                                                        |
| 1082 BG30        | 100.10                                                       | 23.31             | 76.77                                                        |

Table S3. Cross-contamination

| <i>BLANK SAMPLE</i> | <i>CROSS-CONTAMINATION OF MPS DETECTED [TOTAL<br/>NUMBER]</i> |              |                  |
|---------------------|---------------------------------------------------------------|--------------|------------------|
|                     | <i>fibers</i>                                                 | <i>Films</i> | <i>fragments</i> |
| 1. LABORATORY 1     | 34                                                            | 1            | -                |
| 2. TRANSPORTATION   | 1                                                             | -            | -                |
| 3. LABORATORY 2     | 15                                                            | -            |                  |
| 4. FIELD BLANK 1137 | 2                                                             | 3            | 1                |

- Laboratory 1: 1.13 fibers/day/cm<sup>3</sup>
- Laboratory 2: 0.5 fibers/day/cm<sup>3</sup>

## 3. Size distribution of surface sediment samples

The analysis of MPs size distribution in the studied areas revealed distinct patterns. In Lower South Bay and North Bay, the dominant size range for MPs was found to be between 5 mm and 500 µm, with a lower abundance in the size fraction of 500-25 µm. On the contrary, South Bay exhibited a higher abundance of MPs in the size fraction 500-25 µm. In Central Bay, one sample showed a dominant presence of higher fraction, while the other sample had a higher abundance in the lower 500-25 µm fraction. These findings emphasize the variability in MPs size distribution among the different Bay areas.

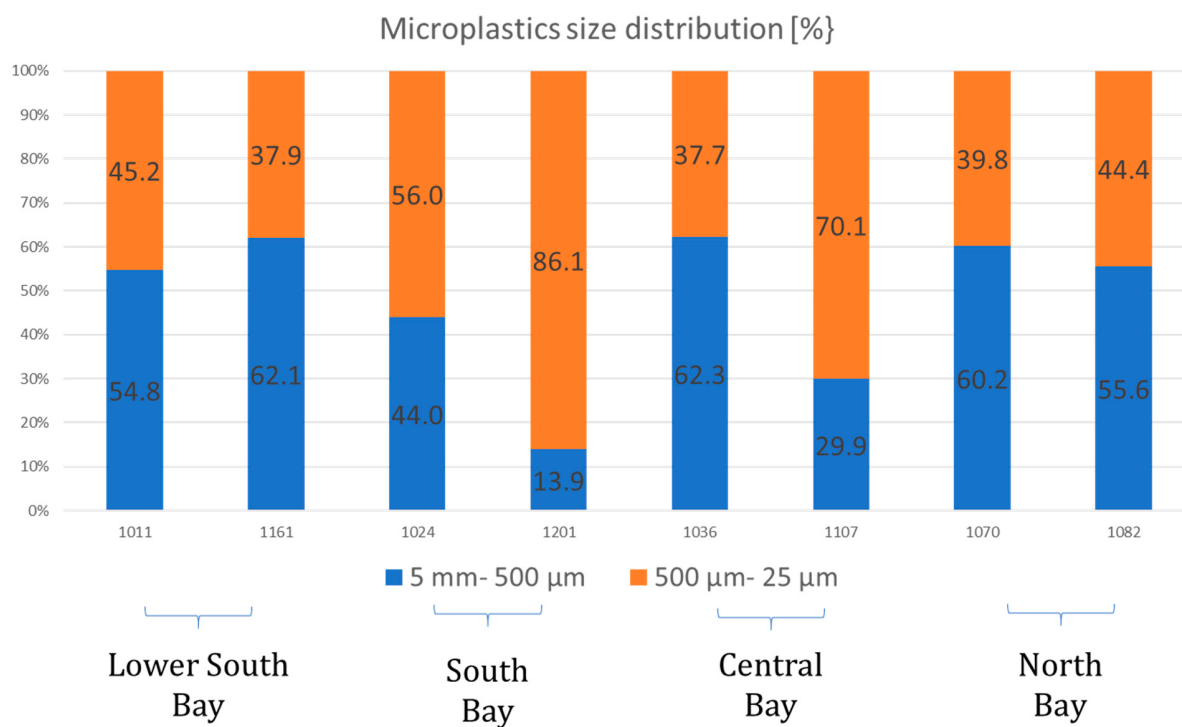

Figure S2 Microplastics size distribution in surface sediments

#### 4. Elaboration of the maps on calcium fluoride slides

In order to identify chemical composition of microplastic particles, FTIR maps were prepared on calcium fluoride slides.

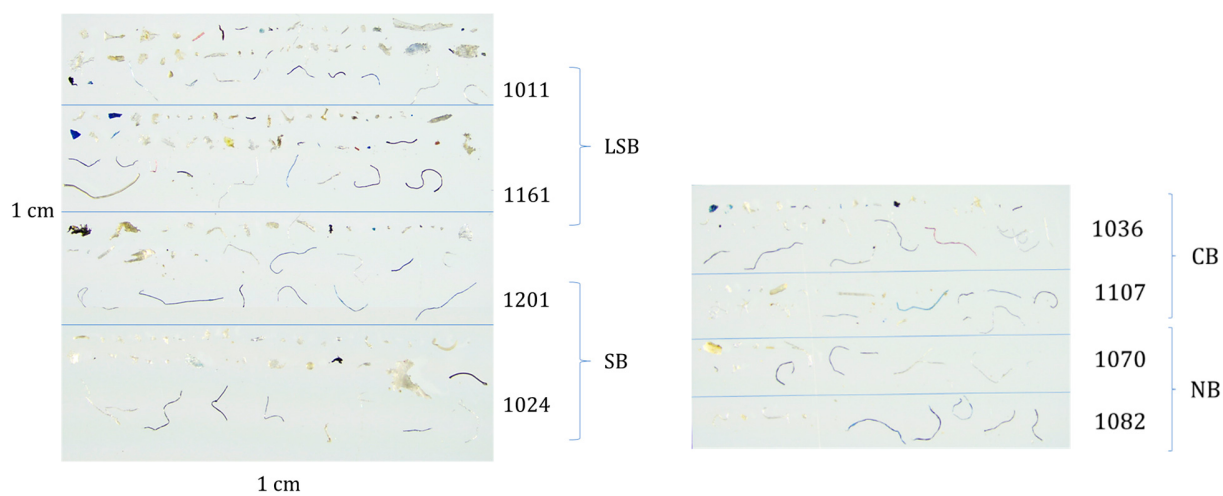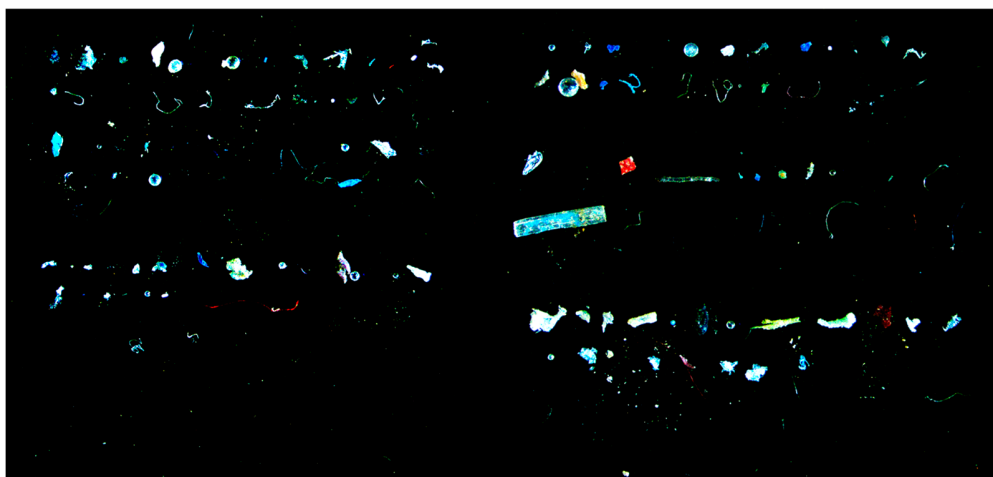

*Figure S3 FTIR maps for microplastic identification*

##### 5. Software for advanced identification of microplastic particles

In order to analyze the spectra Omnic Picta software for advance microplastics identification was used. The acquired spectra were analyzed using the OMNIC Spectra MCS Software. To identify the particles, an

unknown spectrum matching approach was employed by comparing them with available databases such as HR Nicolet Sampler Library, Hummel Polymer Sample Library, Polymer Laminate Films, Wizard Library, Willey's Know It All as well as an own library that was generated with more than 80 spectra. The standard criteria of  $\geq 70\%$  between the sample and reference spectra were followed.

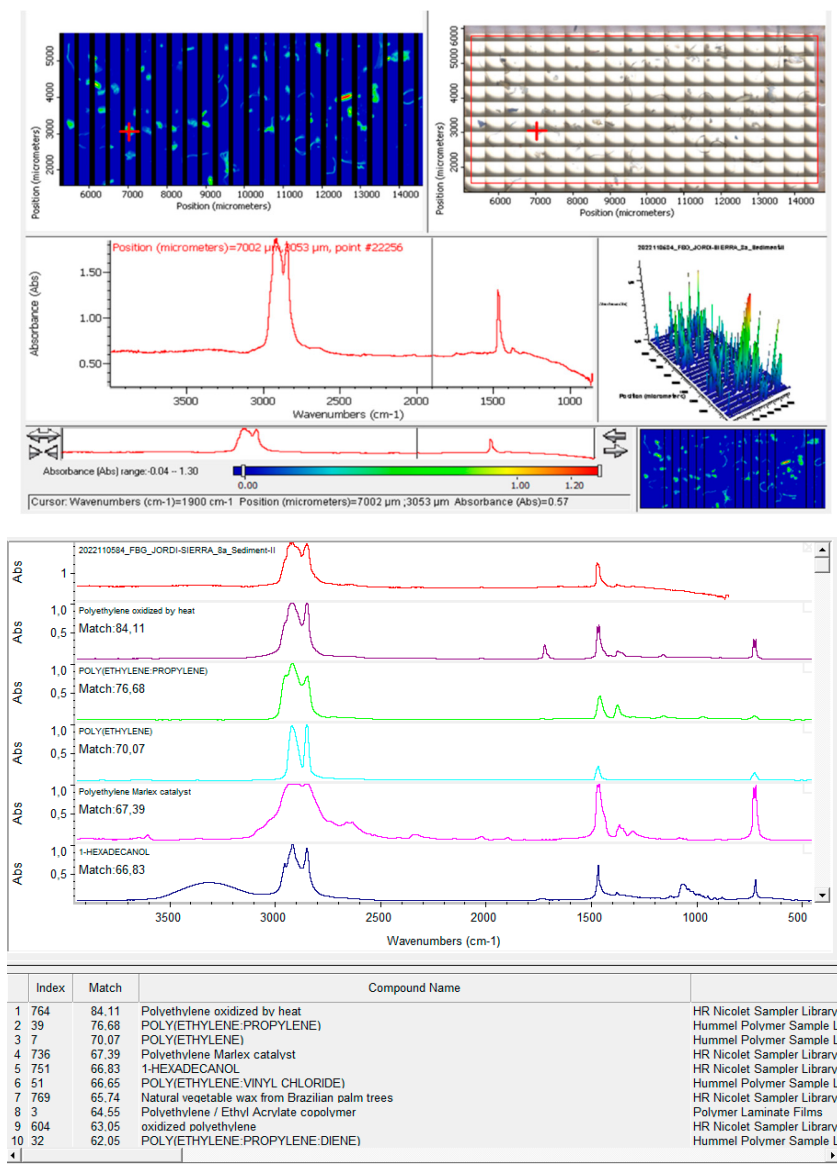

Figure S4 OMNIC Spectra MCS Software for microplastics identification
